# Supplementary material for: Theoretical study on the reaction mechanism of the thermal cis–trans isomerization of fluorine-substituted azobenzene derivatives
Source: Royal Society of Chemistry journal article supplement (doi:10.1039/c8ra01132j), 2018-01-01
Supplement: c8ra01132j1.pdf [file c8ra01132j1.pdf]

Supporting information

**Theoretical Study on the Reaction Mechanism of the Thermal *cis* - *trans* Isomerization of Fluorine Substituted Azobenzene Derivatives**

Xiao-Mei Liu,<sup>a</sup> Xing-Yi Jin,<sup>b</sup> Zhi-Xiang Zhang,<sup>a</sup> Jian Wang,<sup>a\*</sup> Fu-Quan Bai <sup>a\*</sup>

<sup>a</sup> *Institute of Theoretical Chemistry, Laboratory of Theoretical and Computational Chemistry, International Joint Research Laboratory of Nano-Micro Architecture Chemistry, Jilin University, Changchun 130023, People's Republic of China.*

*Email: [abbott@jlu.edu.cn](mailto:abbott@jlu.edu.cn) (J. Wang); [baifq@jlu.edu.cn](mailto:baifq@jlu.edu.cn) (F.-Q. Bai).*

<sup>b</sup> *1<sup>st</sup> Department of Neurosurgery, China-Japan Union Hospital, Jilin University, Xiantai Street NO 126, Changchun 130033, People's Republic of China.*

## CONTENTS

Table S1. The absorption wavelength of the *trans* azobenzene (E-AB).

Table S2. The absorption band of the *trans* azobenzene (E-AB).

Table S3. Absorption properties, including vertical transition energies (in nm/eV), oscillator strengths ( $f$ ) and molecular orbitals involved in the excitation features of the azobenzene compounds.

Table S4. Molecular orbital energies (eV) of n,  $\pi$  and  $\pi^*$  orbitals.

Table S5. The size and direction of dipole moment in the *cis*, *trans* and **TS** configurations in each azobenzene derivative are shown. X, Y, Z represent the three directions of the axis.

Figure S1. The dipole moments of the *cis* and **TS** configurations for each molecule. The blue arrow represents the dipole direction.

Table S1. The absorption wavelength of the *trans* azobenzene (E-AB).

| E-AB    | 6-311g*                              |                                      |
|---------|--------------------------------------|--------------------------------------|
|         | $\lambda_{\pi \rightarrow \pi}$ [nm] | $\lambda_{n \rightarrow \pi^*}$ [nm] |
| M06     | 342                                  | 497                                  |
| M06L    | 360                                  | 494                                  |
| M06-2X  | 301                                  | 488                                  |
| PBE0    | 380                                  | 558                                  |
| B3LYP   | 344                                  | 482                                  |
| Expt[1] | 317                                  | 444                                  |

Table S2. The absorption band of the *trans* azobenzene (E-AB).

| E-AB          | B3LYP                                |                                      |
|---------------|--------------------------------------|--------------------------------------|
|               | $\lambda_{\pi \rightarrow \pi}$ [nm] | $\lambda_{n \rightarrow \pi^*}$ [nm] |
| 6-31+g(d)     | 353                                  | 476                                  |
| 6-31+g(d,p)   | 354                                  | 477                                  |
| 6-311+g(2d,p) | 350                                  | 479                                  |
| 6-311+g(d)    | 351                                  | 480                                  |
| 6-311+g(d,p)  | 351                                  | 481                                  |
| 6-311g*       | 344                                  | 482                                  |
| Expt.[1]      | 317                                  | 444                                  |

Table S3. Absorption properties, including vertical transtion energies (in nm/eV), oscillator strengths ( $f$ ) and molecular orbitals involved in the excitation features of the azobenzene compounds.

|           | Isomer | State          |                         | Transition(CI) | $\lambda/E$ | $f$    |
|-----------|--------|----------------|-------------------------|----------------|-------------|--------|
| <b>AB</b> | Z      | S <sub>1</sub> | $n \rightarrow \pi^*$   | H→L(0.93)      | 477(2.60)   | 0.0500 |
|           | Z      | S <sub>2</sub> | $\pi \rightarrow \pi^*$ | H-1→L(0.90)    | 310 (4.01)  | 0.0705 |
|           | E      | S <sub>1</sub> | $n \rightarrow \pi^*$   | H-1→L(0.99)    | 482 (2.57)  | 0.0000 |
|           | E      | S <sub>2</sub> | $\pi \rightarrow \pi^*$ | H→L(0.99)      | 344 (3.60)  | 0.8933 |
| <b>1a</b> | Z      | S <sub>1</sub> | $n \rightarrow \pi^*$   | H→L(0.93)      | 470 (2.64)  | 0.0467 |
|           | Z      | S <sub>2</sub> | $\pi \rightarrow \pi^*$ | H-1→L(0.91)    | 317 (3.91)  | 0.0274 |
|           | E      | S <sub>1</sub> | $n \rightarrow \pi^*$   | H-1→L(0.99)    | 486 (2.55)  | 0.0000 |
|           | E      | S <sub>2</sub> | $\pi \rightarrow \pi^*$ | H→L(0.99)      | 350 (3.54)  | 0.8853 |
| <b>1b</b> | Z      | S <sub>1</sub> | $n \rightarrow \pi^*$   | H→L(0.93)      | 471 (2.63)  | 0.0538 |
|           | Z      | S <sub>2</sub> | $\pi \rightarrow \pi^*$ | H-1→L(0.91)    | 312 (3.97)  | 0.0120 |
|           | E      | S <sub>1</sub> | $n \rightarrow \pi^*$   | H→L(0.95)      | 495 (2.50)  | 0.0004 |
|           | E      | S <sub>2</sub> | $\pi \rightarrow \pi^*$ | H-1→L(0.94)    | 341 (3.64)  | 0.8714 |
| <b>2a</b> | Z      | S <sub>1</sub> | $n \rightarrow \pi^*$   | H→L(0.92)      | 466 (2.66)  | 0.0521 |
|           | Z      | S <sub>2</sub> | $\pi \rightarrow \pi^*$ | H-1→L(0.96)    | 322 (3.85)  | 0.0166 |
|           | E      | S <sub>1</sub> | $n \rightarrow \pi^*$   | H→L(0.94)      | 500 (2.48)  | 0.0003 |
|           | E      | S <sub>2</sub> | $\pi \rightarrow \pi^*$ | H-1→L(0.91)    | 346 (3.58)  | 0.8477 |
| <b>2b</b> | Z      | S <sub>1</sub> | $n \rightarrow \pi^*$   | H→L(0.92)      | 466 (2.66)  | 0.0582 |
|           | Z      | S <sub>2</sub> | $\pi \rightarrow \pi^*$ | H-1→L(0.97)    | 319 (3.88)  | 0.0048 |
|           | E      | S <sub>1</sub> | $n \rightarrow \pi^*$   | H→L(0.85)      | 506 (2.45)  | 0.0120 |
|           | E      | S <sub>2</sub> | $\pi \rightarrow \pi^*$ | H-1→L(0.82)    | 336 (3.70)  | 0.7512 |
| <b>2c</b> | Z      | S <sub>1</sub> | $n \rightarrow \pi^*$   | H→L(0.92)      | 463(2.68)   | 0.0496 |
|           | Z      | S <sub>2</sub> | $\pi \rightarrow \pi^*$ | H-1→L(0.92)    | 315(3.94)   | 0.0128 |
|           | E      | S <sub>1</sub> | $n \rightarrow \pi^*$   | H→L(0.88)      | 502(2.47)   | 0.0016 |
|           | E      | S <sub>2</sub> | $\pi \rightarrow \pi^*$ | H-1→L(0.88)    | 343(3.62)   | 0.9310 |
| <b>2d</b> | Z      | S <sub>1</sub> | $n \rightarrow \pi^*$   | H→L(0.92)      | 457 (2.71)  | 0.0449 |
|           | Z      | S <sub>2</sub> | $\pi \rightarrow \pi^*$ | H-1→L(0.93)    | 319 (3.89)  | 0.0262 |
|           | E      | S <sub>1</sub> | $n \rightarrow \pi^*$   | H-1→L(0.99)    | 491 (2.53)  | 0.0000 |
|           | E      | S <sub>2</sub> | $\pi \rightarrow \pi^*$ | H→L(0.98)      | 355(3.49)   | 0.8826 |
| <b>2e</b> | Z      | S <sub>1</sub> | $n \rightarrow \pi^*$   | H→L(0.92)      | 478(2.59)   | 0.0575 |
|           | Z      | S <sub>3</sub> | $\pi \rightarrow \pi^*$ | H-1→L(0.92)    | 300(4.14)   | 0.0267 |
|           | E      | S <sub>1</sub> | $n \rightarrow \pi^*$   | H-1→L(0.99)    | 470(2.64)   | 0.0000 |
|           | E      | S <sub>2</sub> | $\pi \rightarrow \pi^*$ | H→L(1.00)      | 350(3.54)   | 0.9120 |

|           | Isomer | State          |                 | Transition(CI) | $\lambda/E$ | f      |
|-----------|--------|----------------|-----------------|----------------|-------------|--------|
| <b>3a</b> | Z      | S <sub>1</sub> | n→ $\pi^*$      | H→L(0.92)      | 460 (2.69)  | 0.0559 |
|           | Z      | S <sub>2</sub> | $\pi$ → $\pi^*$ | H-1→L(0.97)    | 323(3.83)   | 0.0209 |
|           | E      | S <sub>1</sub> | n→ $\pi^*$      | H→L(0.83)      | 507 (2.45)  | 0.0269 |
|           | E      | S <sub>2</sub> | $\pi$ → $\pi^*$ | H-1→L(0.80)    | 333 (3.72)  | 0.6934 |
| <b>3b</b> | Z      | S <sub>1</sub> | n→ $\pi^*$      | H→L(0.92)      | 454 (2.73)  | 0.0484 |
|           | Z      | S <sub>2</sub> | $\pi$ → $\pi^*$ | H-1→L(0.97)    | 323 (3.84)  | 0.0141 |
|           | E      | S <sub>1</sub> | n→ $\pi^*$      | H→L(0.99)      | 508 (2.44)  | 0.0000 |
|           | E      | S <sub>2</sub> | $\pi$ → $\pi^*$ | H-1→L(0.98)    | 349 (2.56)  | 0.9149 |
| <b>4</b>  | Z      | S <sub>1</sub> | n→ $\pi^*$      | H→L(0.92)      | 452 (2.74)  | 0.0534 |
|           | Z      | S <sub>2</sub> | $\pi$ → $\pi^*$ | H-1→L(0.98)    | 327 (3.80)  | 0.0147 |
|           | E      | S <sub>1</sub> | n→ $\pi^*$      | H→L(0.84)      | 514 (2.41)  | 0.0355 |
|           | E      | S <sub>2</sub> | $\pi$ → $\pi^*$ | H-1→L(0.83)    | 330 (3.76)  | 0.9359 |
| <b>5</b>  | Z      | S <sub>1</sub> | n→ $\pi^*$      | H→L(0.91)      | 453 (2.74)  | 0.0621 |
|           | Z      | S <sub>3</sub> | $\pi$ → $\pi^*$ | H-1→L(0.97)    | 310 (4.00)  | 0.0102 |
|           | E      | S <sub>1</sub> | n→ $\pi^*$      | H→L(0.74)      | 505 (2.45)  | 0.0208 |
|           | E      | S <sub>2</sub> | $\pi$ → $\pi^*$ | H-1→L(0.75)    | 338 (3.67)  | 1.0079 |
| <b>6</b>  | Z      | S <sub>1</sub> | n→ $\pi^*$      | H→L(0.88)      | 469(2.64)   | 0.1294 |
|           | Z      | S <sub>2</sub> | $\pi$ → $\pi^*$ | H-1→L(0.94)    | 331 (3.75)  | 0.0524 |
|           | E      | S <sub>1</sub> | n→ $\pi^*$      | H-1→L(0.98)    | 490 (2.53)  | 0.0007 |
|           | E      | S <sub>2</sub> | $\pi$ → $\pi^*$ | H→L(0.99)      | 373 (3.33)  | 1.3464 |
| <b>7</b>  | Z      | S <sub>1</sub> | n→ $\pi^*$      | H→L(0.88)      | 465 (2.66)  | 0.1053 |
|           | Z      | S <sub>2</sub> | $\pi$ → $\pi^*$ | H-1→L(0.94)    | 325 (3.81)  | 0.0477 |
|           | E      | S <sub>1</sub> | n→ $\pi^*$      | H-1→L(0.90)    | 490 (2.53)  | 0.0053 |
|           | E      | S <sub>2</sub> | $\pi$ → $\pi^*$ | H→L(0.91)      | 364 (3.41)  | 1.1881 |
| <b>8</b>  | Z      | S <sub>1</sub> | n→ $\pi^*$      | H→L(0.91)      | 468 (2.65)  | 0.0825 |
|           | Z      | S <sub>2</sub> | $\pi$ → $\pi^*$ | H-1→L(0.98)    | 340 (3.65)  | 0.0232 |
|           | E      | S <sub>1</sub> | n→ $\pi^*$      | H→L(0.86)      | 549 (2.26)  | 0.0776 |
|           | E      | S <sub>4</sub> | $\pi$ → $\pi^*$ | H-1→L(0.76)    | 344 (3.61)  | 1.1258 |
| <b>9</b>  | Z      | S <sub>1</sub> | n→ $\pi^*$      | H→L(0.86)      | 480 (2.58)  | 0.0968 |
|           | Z      | S <sub>2</sub> | $\pi$ → $\pi^*$ | H-1→L(0.97)    | 350 (3.55)  | 0.0261 |
|           | E      | S <sub>1</sub> | n→ $\pi^*$      | H→L(0.87)      | 580 (2.14)  | 0.0819 |
|           | E      | S <sub>5</sub> | $\pi$ → $\pi^*$ | H-1→L(0.84)    | 359 (3.45)  | 1.0895 |

Table S4. Molecular orbital energies (eV) of n,  $\pi$  and  $\pi^*$  orbitals.

|           | E       |       |       | Z       |       |       |
|-----------|---------|-------|-------|---------|-------|-------|
|           | $\pi^*$ | n     | $\pi$ | $\pi^*$ | n     | $\pi$ |
| <b>AB</b> | -2.63   | -6.60 | -6.59 | -2.35   | -6.14 | -7.18 |
| <b>1a</b> | -2.73   | -6.67 | -6.63 | -2.45   | -6.28 | -7.17 |
| <b>1b</b> | -2.65   | -6.53 | -6.64 | -2.44   | -6.26 | -7.18 |
| <b>2a</b> | -2.75   | -6.61 | -6.68 | -2.55   | -6.39 | -7.15 |
| <b>2b</b> | -2.67   | -6.43 | -6.79 | -2.54   | -6.37 | -7.19 |
| <b>2c</b> | -2.75   | -6.58 | -6.71 | -2.53   | -6.40 | -7.25 |
| <b>2d</b> | -2.84   | -6.74 | -6.67 | -2.51   | -6.43 | -7.20 |
| <b>2e</b> | -2.65   | -6.68 | -6.51 | -2.41   | -6.16 | -7.31 |
| <b>3a</b> | -2.75   | -6.47 | -6.95 | -2.64   | -6.51 | -7.23 |
| <b>3b</b> | -2.85   | -6.66 | -6.74 | -2.61   | -6.54 | -7.22 |
| <b>4</b>  | -2.84   | -6.50 | -7.08 | -2.72   | -6.65 | -7.27 |
| <b>5</b>  | -2.86   | -6.57 | -6.95 | -2.78   | -6.66 | -7.55 |
| <b>6</b>  | -2.52   | -6.41 | -6.11 | -2.50   | -6.10 | -6.87 |
| <b>7</b>  | -2.54   | -6.45 | -6.17 | -2.51   | -6.16 | -6.98 |
| <b>8</b>  | -3.39   | -6.78 | -7.51 | -3.20   | -6.95 | -7.55 |
| <b>9</b>  | -3.86   | -7.03 | -7.81 | -3.67   | -7.23 | -7.86 |

Table S5. The size and direction of dipole moment in the *cis*, *trans* and **TS** configurations in each

azobenzene derivative are shown. X, Y, Z represent the three directions of the axis.

| Dipole moment | X       | Y       | Z       | Total  |
|---------------|---------|---------|---------|--------|
|               | [D]     |         |         |        |
| AB-Z          | 0.0000  | 0.0000  | -4.2870 | 4.2870 |
| AB-TS         | -3.7588 | 2.0166  | 0.0000  | 4.2656 |
| AB-E          | 0.0000  | 0.0000  | 0.0000  | 0.0000 |
| 1a-Z          | 0.8747  | -4.4815 | -1.1409 | 4.7064 |
| 1a-TS         | -2.4644 | 0.7160  | 2.4475  | 3.5463 |
| 1a-E          | -0.3407 | -1.6026 | 0.0000  | 1.6384 |
| 1b-Z          | -1.0209 | 5.4809  | 0.5681  | 5.6040 |
| 1b-TS         | -3.0155 | 3.9726  | 0.0000  | 4.9874 |
| 1b-E          | -0.8905 | -1.4833 | -0.0238 | 1.7302 |
| 2a-Z          | -2.0850 | 5.9604  | 0.4017  | 6.3273 |
| 2a-TS         | 1.3882  | 3.1247  | -2.7303 | 4.3756 |
| 2a-E          | 0.6390  | -3.0516 | 0.0105  | 3.1178 |
| 2b-Z          | 0.0000  | 6.5542  | 0.0000  | 6.5542 |
| 2b-TS         | -1.3297 | 3.1573  | -2.7258 | 4.3780 |
| 2b-E          | 0.0000  | 0.0000  | -0.5159 | 0.5159 |
| 2c-Z          | 0.0303  | 4.3701  | 3.4613  | 5.5748 |
| 2c-TS         | 1.4246  | -2.2163 | 2.1021  | 3.3705 |
| 2c-E          | -1.4398 | -0.1036 | 0.0144  | 1.4436 |
| 2d-Z          | 0.0000  | 0.0002  | -4.6064 | 4.6064 |
| 2d-TS         | -3.3981 | -0.7124 | -1.6670 | 3.8514 |
| 2d-E          | 0.0000  | 0.0000  | 0.5999  | 0.5999 |
| 2e-Z          | 0.0000  | 0.0000  | -1.5225 | 1.5225 |
| 2e-TS         | 4.0754  | -0.1500 | 0.0000  | 4.0782 |
| 2e-E          | 0.0000  | 0.0000  | 0.0000  | 0.0000 |
| 3a-Z          | -1.1902 | -5.8806 | 3.4281  | 6.9102 |
| 3a-TS         | 0.3215  | -4.2031 | 2.5308  | 4.9168 |
| 3a-E          | -0.2628 | -1.5374 | -0.4121 | 1.6133 |
| 3b-Z          | 1.0040  | 3.5354  | -4.6420 | 5.9207 |
| 3b-TS         | -2.1598 | -3.0499 | -1.7035 | 4.1071 |
| 3b-E          | 1.2186  | 1.4563  | 0.0000  | 1.8989 |
| 4-Z           | 0.0000  | 0.0000  | 6.9046  | 6.9046 |
| 4-TS          | -0.9906 | -4.1549 | -1.2504 | 4.4506 |
| 4-E           | 0.0000  | 0.0000  | 0.2133  | 0.2133 |
| 5-Z           | 0.0000  | 0.0000  | 4.1550  | 4.1550 |
| 5-TS          | -0.6991 | -2.2886 | -0.5002 | 2.4447 |
| 5-E           | -0.0001 | 0.0000  | 0.1223  | 0.1223 |
| 6-Z           | 0.0011  | 7.5437  | -0.0004 | 7.5437 |
| 6-TS          | 1.0124  | -3.4341 | -0.3413 | 3.5965 |
| 6-E           | 3.2778  | -0.8594 | 1.4534  | 3.6871 |
| 7-Z           | -1.0225 | 4.9081  | -1.9877 | 5.3931 |
| 7-TS          | 1.0311  | -2.6314 | -2.6314 | 2.8388 |

|      |         |         |         |        |
|------|---------|---------|---------|--------|
| 7-E  | 0.0076  | -0.0042 | -0.6004 | 0.6005 |
| 8-Z  | 0.2623  | 3.2925  | 0.0920  | 3.3042 |
| 8-TS | -6.7258 | 0.3628  | -1.8764 | 6.9920 |
| 8-E  | 0.0000  | 0.0001  | 1.2116  | 1.2116 |
| 9-Z  | -0.2844 | -1.3981 | 0.0826  | 1.4292 |
| 9-TS | -8.0549 | 2.2812  | 0.6421  | 8.3963 |
| 9-E  | -0.5885 | 0.1069  | -0.0382 | 0.5994 |



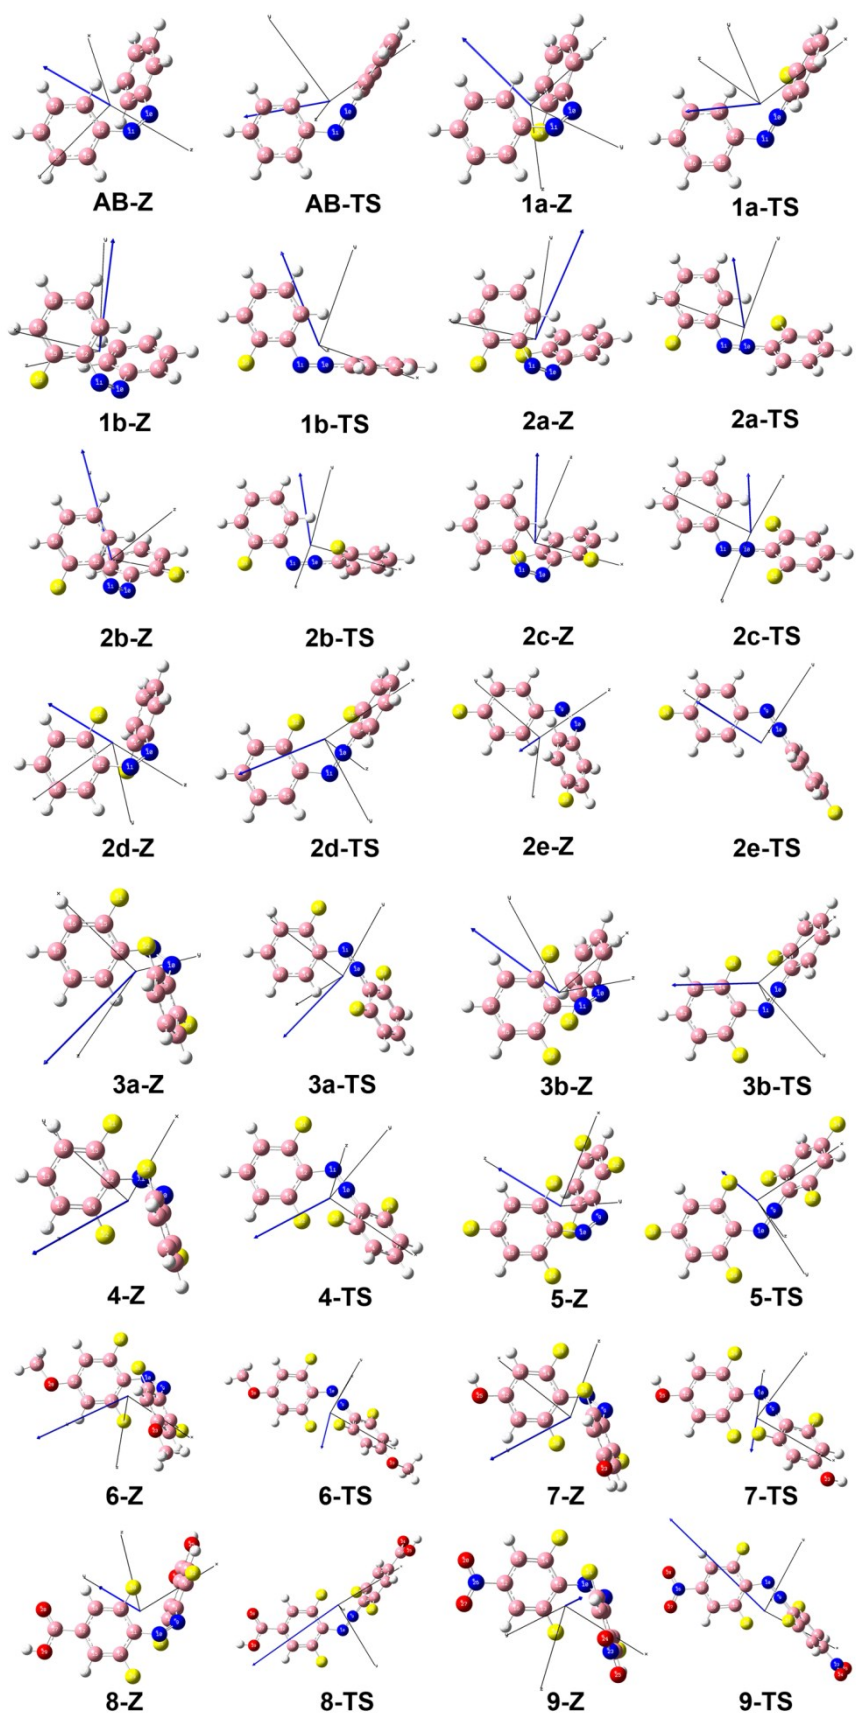

Figure S1 The dipole moments of the *cis* and TS configurations for each molecule. The blue arrow represents the dipole direction.

## Reference

[1] C. Knie, M. Utecht, F. Zhao, H. Kulla, S. Kovalenko, A.M. Brouwer, P. Saalfrank, S. Hecht, D. Blegler, ortho-Fluoroazobenzenes: Visible Light Switches with Very Long-Lived Z Isomers, *Chemistry-a European Journal*, 20 (2014) 16492-16501.
